# Supplementary material for: Design Characteristics Influence Performance of Clinical Prediction Rules in Validation: A Meta-Epidemiological Study
Source: PubMed Central journal article supplement (PMC4701404; doi:10.1371/journal.pone.0145779), 2016-01-05
Supplement: pone.0145779.s001.pdf [file pone.0145779.s001.pdf]

## S1 Appendix. Search strategies for systematic reviews of clinical prediction rule studies.

|     |                                                                                                                                                                                                                                                                                                                                                                                                                                                                |     |                                                                                                                                                                                                                                                                                                                                                                                                                                                                                                       |
|-----|----------------------------------------------------------------------------------------------------------------------------------------------------------------------------------------------------------------------------------------------------------------------------------------------------------------------------------------------------------------------------------------------------------------------------------------------------------------|-----|-------------------------------------------------------------------------------------------------------------------------------------------------------------------------------------------------------------------------------------------------------------------------------------------------------------------------------------------------------------------------------------------------------------------------------------------------------------------------------------------------------|
| (a) | <p><b>Medline (OvidSP™, 1946 to 2011)</b></p> <ol style="list-style-type: none"> <li>1. predict:.mp.</li> <li>2. scor:.tw.</li> <li>3. observ:.mp.</li> <li>4. 1 or 2 or 3</li> <li>5. Cochrane database of systematic reviews.jn.</li> <li>6. search.tw</li> <li>7. meta-analysis.pt.</li> <li>8. medline.tw.</li> <li>9. systematic review.tw.</li> <li>10. 5 or 6 or 7 or 8 or 9</li> <li>11. 4 and 10</li> <li>12. limit 11 to yr="2006 - 2010"</li> </ol> | (b) | <p><b>Embase (OvidSP™, 1974 to 2011)</b></p> <ol style="list-style-type: none"> <li>1. predict:.tw.</li> <li>2. exp methodology/</li> <li>3. validat:.tw.</li> <li>4. 1 or 2 or 3</li> <li>5. meta-analysis.tw.</li> <li>6. systematic review.tw.</li> <li>7. MEDLINE.tw</li> <li>8. 5 or 6 or 7</li> <li>9. 4 and 8</li> <li>10. limit 9 to yr="2006 - 2010"</li> </ol>                                                                                                                              |
| (c) | <p><b>Medion database</b></p> <ol style="list-style-type: none"> <li>1. Systematic Reviews of Diagnostic Studies</li> <li>2. limit 1 to 2006</li> <li>3. limit 1 to 2007</li> <li>4. limit 1 to 2008</li> <li>5. limit 1 to 2009</li> <li>6. limit 1 to 2010</li> </ol>                                                                                                                                                                                        | (d) | <p><b>Cochrane library</b></p> <ol style="list-style-type: none"> <li>1. (predict*):ti,ab,kw</li> <li>2. (rule*):ti,ab,kw</li> <li>3. (decision* model*):ti,ab,kw</li> <li>4. (decision* guide*):ti,ab,kw</li> <li>5. (decision* tool*):ti,ab,kw</li> <li>6. (decision* support*):ti,ab,kw</li> <li>7. (prognos* model*):ti,ab,kw</li> <li>8. (prognos* tool*):ti,ab,kw</li> <li>9. (#1 or #2 or #3 or #4 or #5 or #6 or #7 or #8) from 2006 to 2010 in Cochrane Reviews and Other Reviews</li> </ol> |
