# Supplementary material for: Design Characteristics Influence Performance of Clinical Prediction Rules in Validation: A Meta-Epidemiological Study
Source: PubMed Central journal article supplement (PMC4701404; doi:10.1371/journal.pone.0145779), 2016-01-05
Supplement: pone.0145779.s002.pdf [file pone.0145779.s002.pdf]

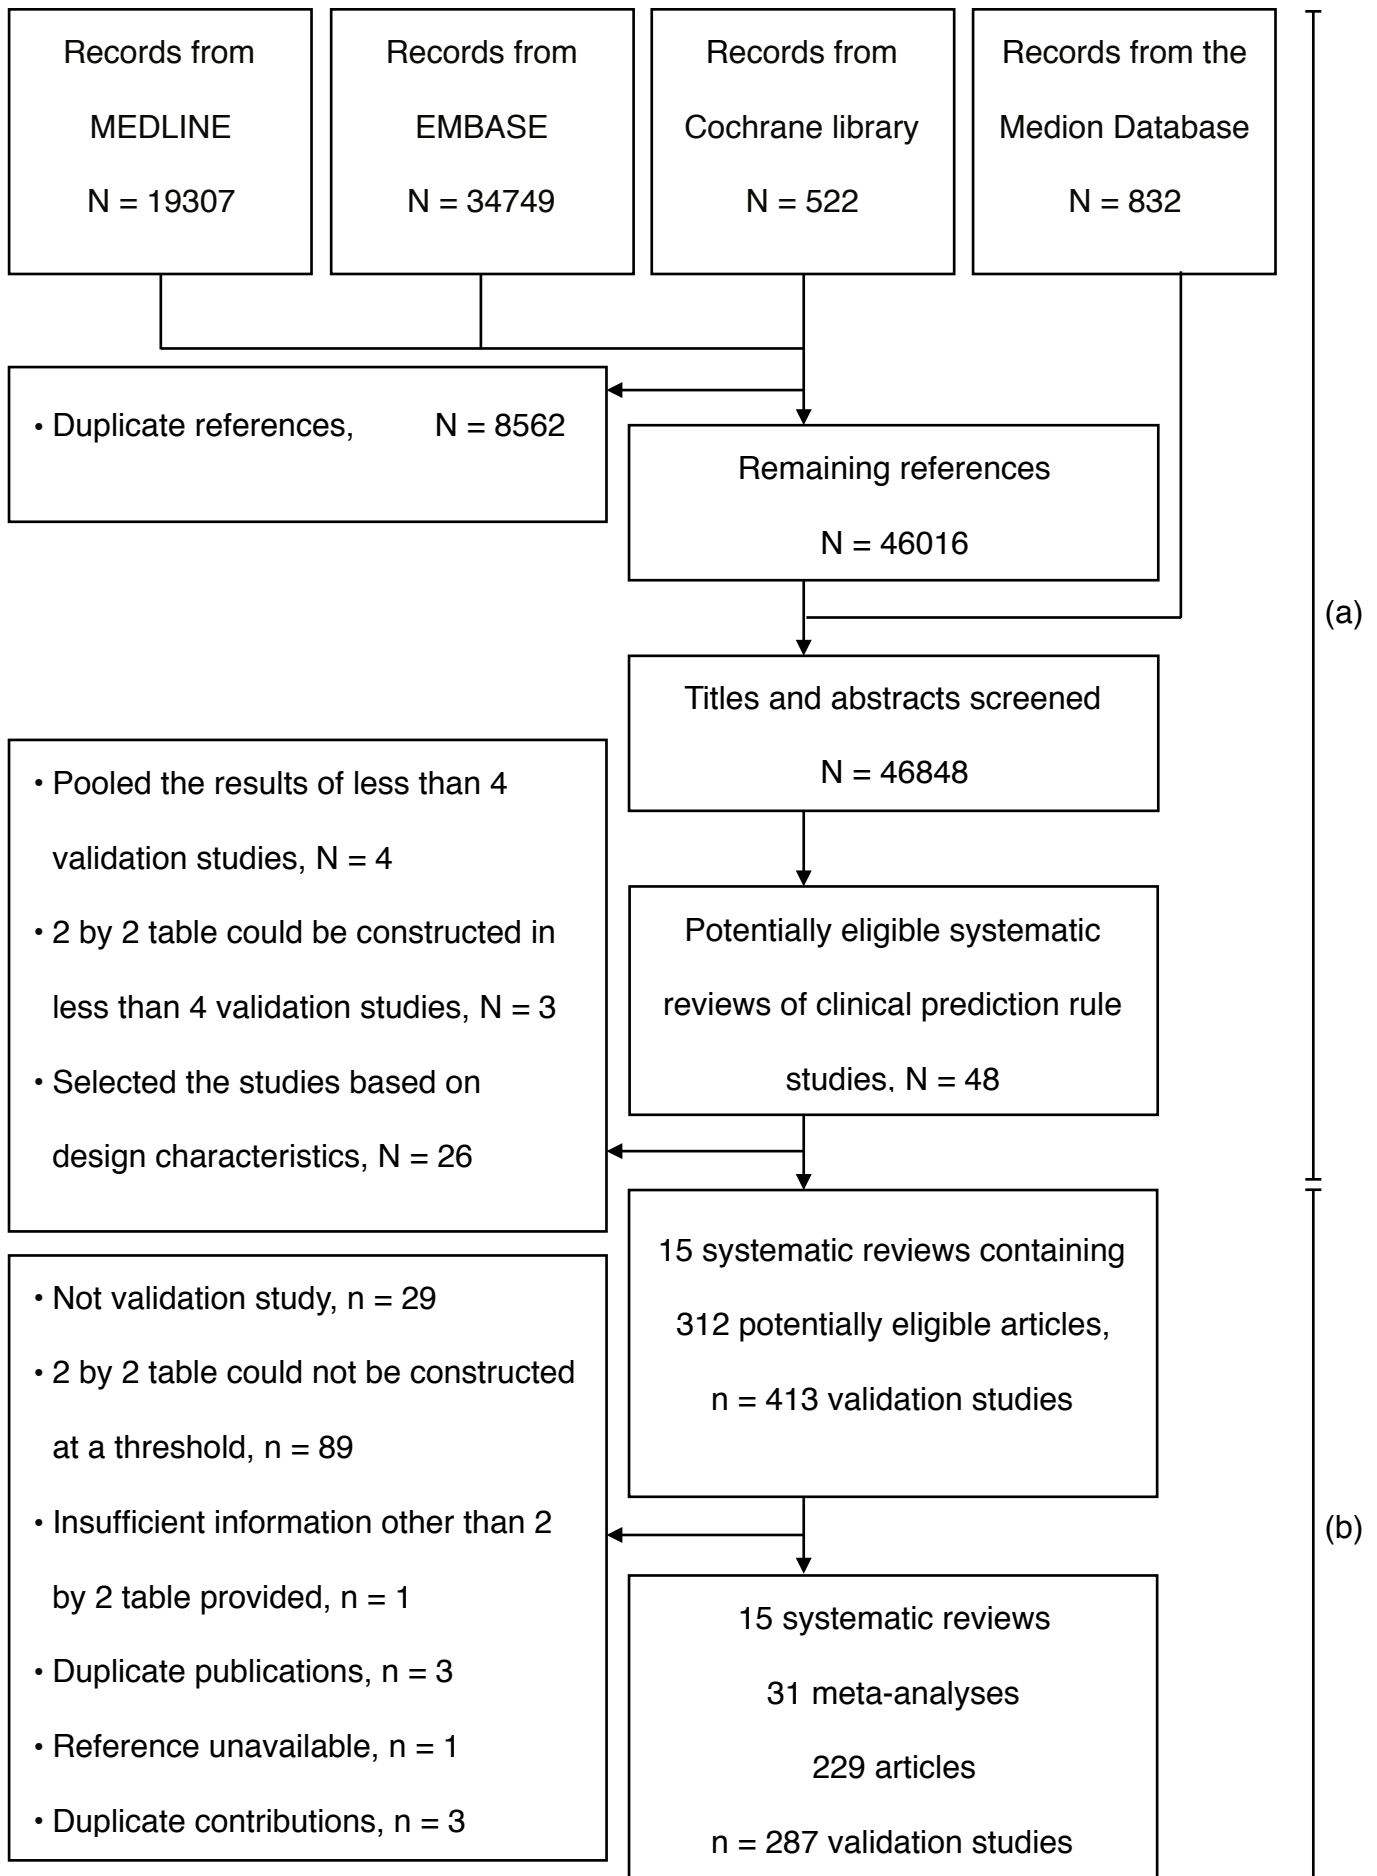

**S2 Appendix. Flow diagram.** Selection of (a) systematic reviews and (b) validation studies.
