# Supplementary material for: Design Characteristics Influence Performance of Clinical Prediction Rules in Validation: A Meta-Epidemiological Study
Source: PubMed Central journal article supplement (PMC4701404; doi:10.1371/journal.pone.0145779), 2016-01-05
Supplement: pone.0145779.s004.pdf [file pone.0145779.s004.pdf]

### S3 Appendix. Systematic reviews of clinical prediction rule studies included in the study.

| Systematic review           | Clinical prediction rule                       | Outcome                                                                                                                                                                            | Number of Validation studies |
|-----------------------------|------------------------------------------------|------------------------------------------------------------------------------------------------------------------------------------------------------------------------------------|------------------------------|
| <b>Banal et al., 2009</b>   | American College of Rheumatology 1987 Criteria | Early rheumatoid arthritis determined by expert opinion                                                                                                                            | 6                            |
|                             | American College of Rheumatology 1987 Criteria | Established rheumatoid arthritis determined by expert opinion                                                                                                                      | 10                           |
| <b>Brennan et al., 2010</b> | Hospital Anxiety and Depression Scale (HADS-D) | Major depression determined by standardized interview                                                                                                                              | 8                            |
|                             | Hospital Anxiety and Depression Scale (HADS-D) | All depressive disorders determined by standardized interview                                                                                                                      | 10                           |
| <b>Ceriani et al., 2010</b> | 3-level Wells score                            | Pulmonary embolism define by negative D-dimer with intermediate or low clinical probability, ventilation-perfusion lung scan, helical computed tomography or pulmonary angiography | 13                           |
|                             | 2-level Wells score                            | Pulmonary embolism define by negative D-dimer with intermediate or low clinical probability, ventilation-perfusion lung scan, helical computed tomography or pulmonary angiography | 6                            |
|                             | Geneva score                                   | Pulmonary embolism define by negative D-dimer with intermediate or low clinical probability, ventilation-perfusion lung scan, helical computed tomography or pulmonary angiography | 5                            |
| <b>Dowling et al., 2009</b> | Ottawa Ankle Rules                             | Ankle or mid-foot fracture in children determined by X-ray or ankle, foot or proxy measure such as telephone follow up                                                             | 10                           |
| <b>Geomini et al., 2009</b> | Sassone model                                  | Ovarian malignancy based on histology                                                                                                                                              | 17                           |
|                             | Lerner model                                   | Ovarian malignancy based on histology                                                                                                                                              | 7                            |
|                             | DePriest model                                 | Ovarian malignancy based on histology                                                                                                                                              | 7                            |
|                             | Ferrazi model                                  | Ovarian malignancy based on histology                                                                                                                                              | 6                            |
|                             | Risk of Malignancy Index 1                     | Ovarian malignancy based on histology                                                                                                                                              | 12                           |
|                             | Risk of Malignancy Index 2                     | Ovarian malignancy based on histology                                                                                                                                              | 6                            |

| <b>Systematic review</b>        | <b>Clinical prediction rule</b>                | <b>Outcome</b>                                                                                                                             | <b>Number of Validation studies</b> |
|---------------------------------|------------------------------------------------|--------------------------------------------------------------------------------------------------------------------------------------------|-------------------------------------|
| <b>Gilbody et al., 2007</b>     | Patient Health Questionnaire (PHQ) 9           | Depression determined by standardized diagnostic interview                                                                                 | 9                                   |
| <b>Giles and Rothwell, 2010</b> | ABCD score                                     | Stroke based on World Health Organization (WHO) Criteria                                                                                   | 8                                   |
|                                 | ABCD2 score                                    | Stroke based on World Health Organization (WHO) Criteria                                                                                   | 6                                   |
| <b>Harrington et al., 2010</b>  | St. Thomas's risk assessment tool (STRATIFY)   | Fall in hospitalized patients                                                                                                              | 10                                  |
| <b>Hewitt et al., 2009</b>      | Edinburgh Postnatal Depression Scale (EPDS)    | Major depression determined by standardized interview                                                                                      | 16                                  |
|                                 | Edinburgh Postnatal Depression Scale (EPDS)    | Major and minor depression determined by standardized interview                                                                            | 16                                  |
|                                 | Edinburgh Postnatal Depression Scale (EPDS)    | Any psychiatric disorder determined by standardized interview                                                                              | 5                                   |
| <b>McPhail et al., 2010</b>     | Kings's College Hospital Criteria (KCC)        | Emergency liver transplantation or death                                                                                                   | 11                                  |
| <b>Mitchell et al., 2010b</b>   | Geriatric Depression Scale (GDS) 30            | Depression in medical settings and nursing homes determined by structured interview                                                        | 21                                  |
|                                 | Geriatric Depression Scale (GDS) 15            | Depression in medical settings and nursing homes determined by structured interview                                                        | 14                                  |
| <b>Mitchell et al., 20101a</b>  | Geriatric Depression Scale (GDS) 30            | Depression in primary care determined by structured interview                                                                              | 7                                   |
|                                 | Geriatric Depression Scale (GDS) 15            | Depression in primary care determined by structured interview                                                                              | 8                                   |
| <b>Mitchell et al., 2010c</b>   | Hospital Anxiety and Depression Scale (HADS-D) | Depression determined by structured interview                                                                                              | 7                                   |
|                                 | Hospital Anxiety and Depression Scale (HADS-T) | Depression determined by structured interview                                                                                              | 5                                   |
|                                 | Hospital Anxiety and Depression Scale (HADS-T) | Any mental illness determined by structured interview                                                                                      | 4                                   |
| <b>Serrano et al., 2010</b>     | San Francisco Syncope Rule (SFSR)              | Adverse outcome after stroke (death, MI, arrhythmia, PE, stroke, subarachnoid hemorrhage, hemorrhage, ED return visit and hospitalization) | 7                                   |
| <b>Warnick et al., 2008</b>     | Child Behavior Checklist (CBCL)                | Any psychiatric disorder determined by structured interview                                                                                | 10                                  |
