# Supplementary material for: Design Characteristics Influence Performance of Clinical Prediction Rules in Validation: A Meta-Epidemiological Study
Source: PubMed Central journal article supplement (PMC4701404; doi:10.1371/journal.pone.0145779), 2016-01-05
Supplement: pone.0145779.s005.pdf [file pone.0145779.s005.pdf]

**S4 Appendix. Univariable analysis.** Influence of design characteristics on the performance of clinical prediction rule.

| Design property   | Level          | Study | (%)    | RDOS (95% CI)    | I <sup>2</sup> % |
|-------------------|----------------|-------|--------|------------------|------------------|
| Sample size       | Adequate       | 37    | (12.9) | 1                |                  |
|                   | Inadequate     | 250   | (87.1) | 1.5 (1.2 - 1.9)  | 13.2             |
| Patient selection | Consecutive    | 131   | (45.6) | 1                |                  |
|                   | Nonconsecutive | 45    | (15.7) | 1.3 (0.9 - 1.9)  | 0                |
|                   | Unclear        | 111   | (38.7) | 1.1 (0.9 - 1.5)  | 38.5             |
| Disease spectrum  | Cohort         | 122   | (42.5) | 1                |                  |
|                   | Case-control   | 55    | (19.2) | 1.3 (0.6 - 2.5)  | 85.3             |
|                   | Unclear        | 110   | (38.3) | 0.6 (0.4 - 1.0)  | 66.1             |
| Validation type   | Broad          | 52    | (18.1) | 1                |                  |
|                   | Narrow         | 205   | (71.4) | 1.8 (0.8 - 3.8)  | 62.0             |
|                   | Unclear        | 30    | (10.5) | 3.1 (0.9 - 10.5) | 35.2             |
| Assessment        | Blind          | 72    | (25.1) | 1                |                  |
|                   | Non-blind      | 8     | (2.8)  | 1.0 (0.7 - 1.6)  | 0                |
|                   | Unclear        | 207   | (72.1) | 1.2 (0.8 - 1.7)  | 39.3             |
| Verification      | Complete       | 145   | (50.5) | 1                |                  |
|                   | Partial        | 27    | (9.4)  | 0.9 (0.5 - 1.5)  | 57.3             |
|                   | Differential   | 51    | (17.8) | 1.8 (1.1 - 3.1)  |                  |
|                   | Unclear        | 64    | (22.3) | 0.7 (0.4 - 1.2)  | 54               |
| Data collection   | Prospective    | 210   | (73.2) | 1                |                  |
|                   | Retrospective  | 62    | (21.6) | 0.9 (0.6 - 1.4)  | 41.9             |
|                   | Unclear        | 15    | (5.2)  | 1.4 (0.8 - 2.5)  | 1                |
